# Supplementary material
Source: Springer Nature journal article supplement (https://www.springermedizin.de/resource/supplementary/12889_2010_2753_MOESM1_ESM.pdf/9488180)
Supplement: MOESM1 [file 9488180]

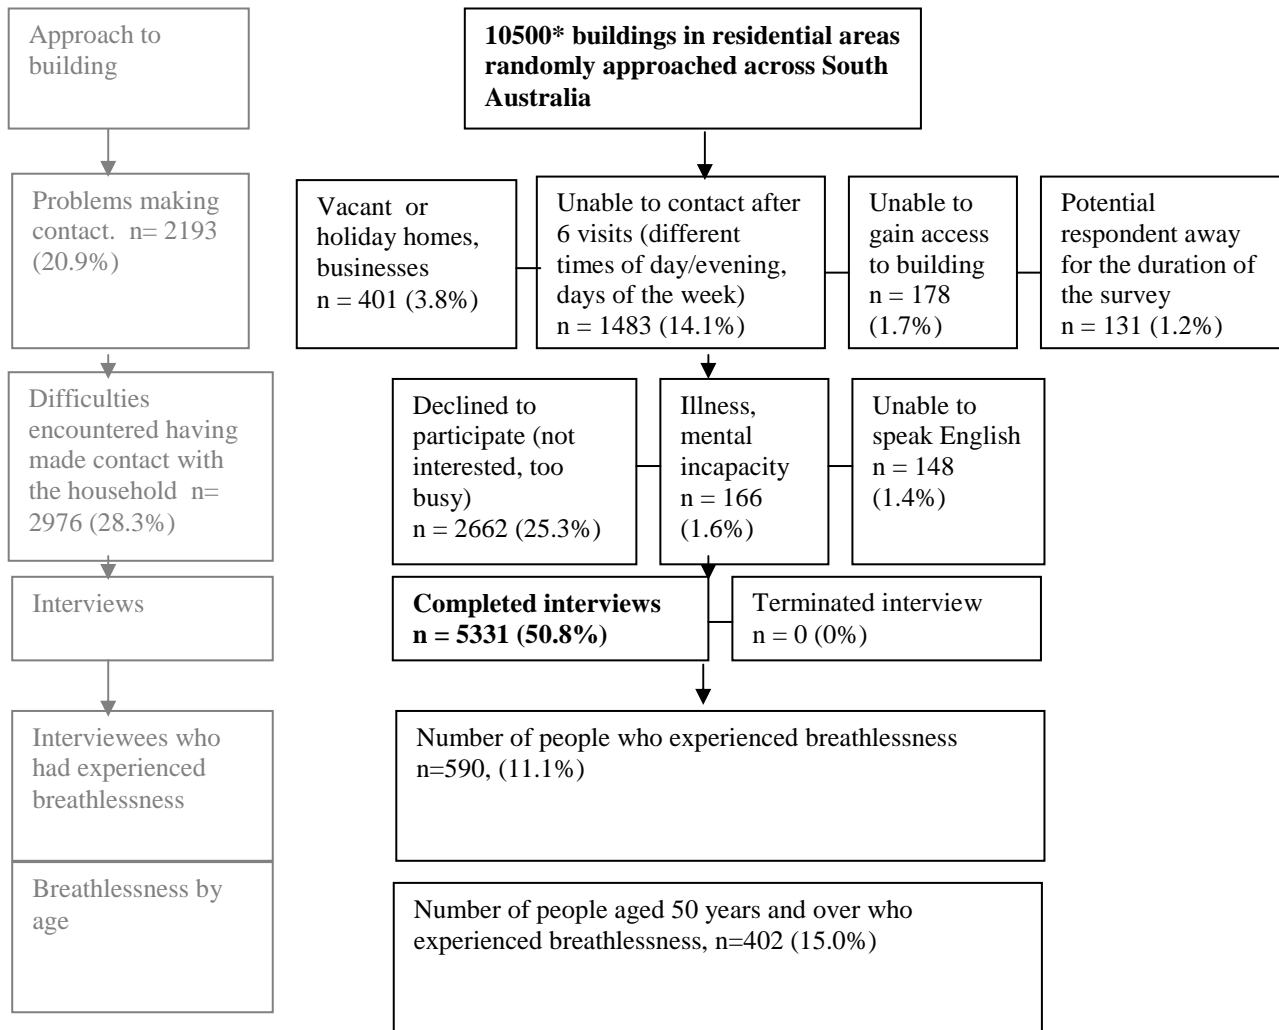

**\* The denominator for percentages is the total number of households approached (10500) down to the line of the total number of interviews. Unweighted data.**
